# Supplementary material for: Ditopic hydridoborates and hydridoboranes: bridging ligands in coordination polymers and versatile hydroboration reagents
Source: Royal Society of Chemistry journal article supplement (doi:10.1039/c0dt01271h), 2010-12-15
Supplement: c0dt01271h.pdf [file c0dt01271h.pdf]

# Supporting Information

## **Ditopic Hydridoborates and Hydridoboranes: Bridging Ligands in Coordination Polymers and Versatile Hydroboration Reagents**

**Daniel Franz, Michael Bolte, Hans-Wolfram Lerner, and Matthias Wagner\***

### **Content:**

**X-ray crystal structure analyses of 3, 4, 5, and  $(\text{Li}(\text{thf})_2)_2[6]$**

## X-ray crystal structure analyses of **3**, **4**, **5**, and $(\text{Li}(\text{thf})_2)_2[\mathbf{6}]$

**Experimental Details.** Data were collected on a STOE IPDS II two-circle diffractometer with graphite-monochromated  $\text{MoK}_\alpha$  radiation ( $\lambda = 0.71073 \text{ \AA}$ ). An empirical absorption correction was performed for **4** using the MULABS<sup>[1]</sup> option in PLATON<sup>[2]</sup>. The structures were solved by direct methods using the program SHELXS<sup>[3]</sup> and refined against  $F^2$  with full-matrix least-squares techniques using the program SHELXL-97<sup>[4]</sup>.

Compound **3** crystallises with two crystallographically independent half-molecules in the asymmetric unit (**3<sub>A</sub>**, **3<sub>B</sub>**). In **5**, three atoms of an *n*-hexyl chain are disordered over two sites with a site occupation factor of 0.69(1) for the major occupied site. The disordered atoms in **5** were refined isotropically. The crystals of **5** degraded upon cooling and had therefore to be measured at 293 K, which, together with the disorder, explains the poor figures of merit.

CCDC reference numbers: 793266 (**3**), 793267 (**4**), 793268 (**5**), and 793269 ( $(\text{Li}(\text{thf})_2)_2[\mathbf{6}]$ ).

[1] R. H. Blessing, *Acta Crystallogr. Sect. A* **1995**, *51*, 33-38. [2] A. L. Spek, *J. Appl. Cryst.* **2003**, *36*, 7-13. [3] G. M. Sheldrick, *Acta Crystallogr. Sect. A* **1990**, *46*, 467-473. [4] G. M. Sheldrick, *SHELXL-97. A Program for the Refinement of Crystal Structures*, Universität Göttingen, 1997.

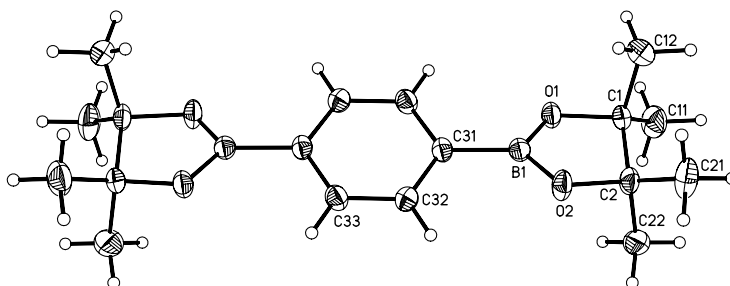

**Figure 1S:** Molecular structure and numbering scheme of compound **3<sub>A</sub>**. Displacement ellipsoids are drawn at the 50% probability level. Selected bond lengths (Å), bond angles (deg), and torsion angles (deg): B(1)–O(1) 1.368(2), B(1)–O(2) 1.367(2), B(1)–C(31) 1.567(2); O(1)–B(1)–O(2) 113.9(1), O(1)–B(1)–C(31) 122.5(1), O(2)–B(1)–C(31) 123.6(1); O(2)–B(1)–C(31)–C(32) –16.6(2). *Note:* Compound **3** crystallises with two crystallographically independent half-molecules in the asymmetric unit (**3<sub>A</sub>**, **3<sub>B</sub>**). Since all key structure parameters of **3<sub>A</sub>** and **3<sub>B</sub>** are very similar, only the data of **3<sub>A</sub>** are given here.

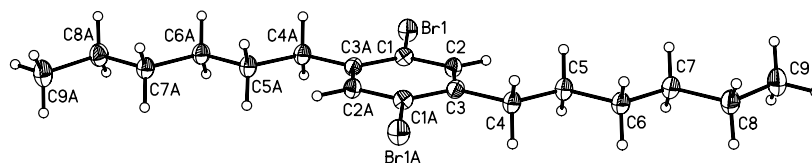

**Figure 2S:** Molecular structure and numbering scheme of compound **4**. Displacement ellipsoids are drawn at the 50% probability level. Selected bond length (Å), bond angles (deg), and torsion angle (deg): Br(1)–C(1) 1.901(2); Br(1)–C(1)–C(2) 117.2(1), Br(1)–C(1)–C(3A) 119.8(1), C(2)–C(1)–C(3A) 122.9(2); C(2)–C(3)–C(4)–C(5) 0.1(2). Symmetry transformation used to generate equivalent atoms: A:  $-x, -y, -z+1$ .

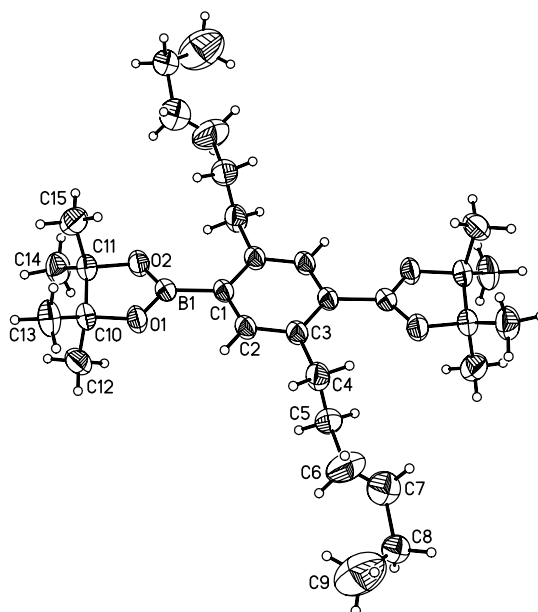

**Figure 3S:** Molecular structure and numbering scheme of compound **5**. Displacement ellipsoids are drawn at the 50% probability level. Selected bond lengths (Å), bond angles (deg), and torsion angles (deg): B(1)–O(1) 1.362(3), B(1)–O(2) 1.349(4), B(1)–C(1) 1.571(4); O(1)–B(1)–O(2) 112.8(2), O(1)–B(1)–C(1) 120.4(2), O(2)–B(1)–C(1) 126.8(2); O(1)–B(1)–C(1)–C(2) 8.7(4), C(2)–C(3)–C(4)–C(5) 92.8(4).

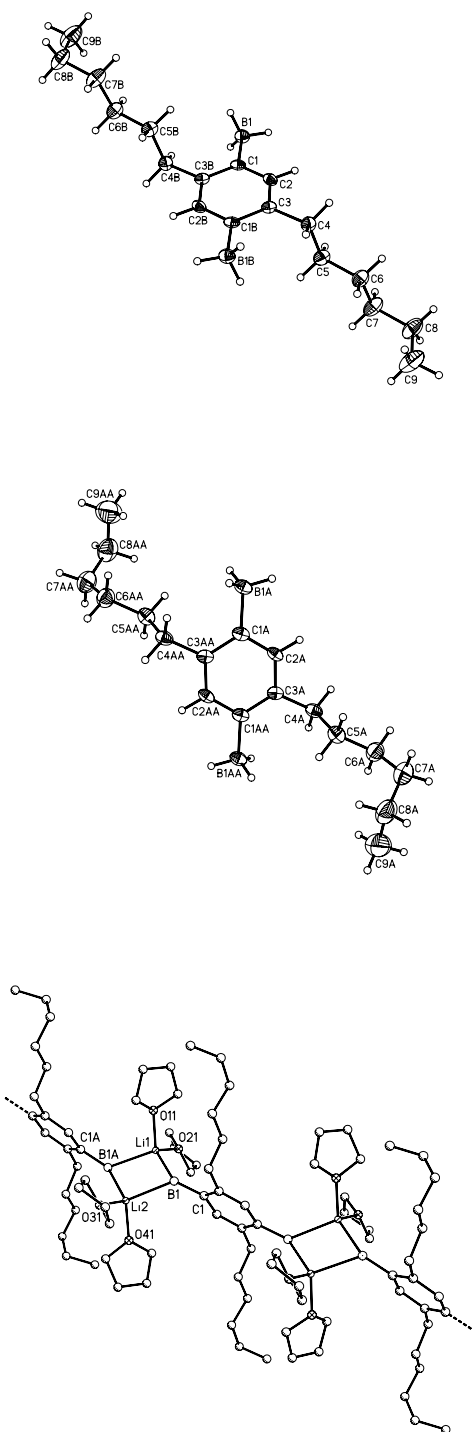

**Figure 4S:** Molecular structure of  $(\text{Li}(\text{thf})_2)_2[\mathbf{6}]$ ; hydrogen atoms attached to carbon have been omitted for clarity. Displacement ellipsoids are drawn at the 50% probability level. Selected bond lengths ( $\text{\AA}$ ), atom $\cdots$ atom distances ( $\text{\AA}$ ), angles (deg), and dihedral angle (deg):  $\text{B}(1)\text{--}\text{C}(1) = 1.615(2)$ ,  $\text{B}(1\text{A})\text{--}\text{C}(1\text{A}) = 1.618(2)$ ,  $\text{B}(1)\cdots\text{Li}(1) = 2.448(1)$ ,  $\text{B}(1)\cdots\text{Li}(2) = 2.516(4)$ ,  $\text{B}(1\text{A})\cdots\text{Li}(1) = 2.492(5)$ ,  $\text{B}(1\text{A})\cdots\text{Li}(2) = 2.443(1)$ ,  $\text{Li}(1)\cdots\text{Li}(2) = 3.135(4)$ ;  $\text{B}(1)\cdots\text{Li}(1)\cdots\text{B}(1\text{A}) = 101.5(1)$ ,  $\text{B}(1)\cdots\text{Li}(2)\cdots\text{B}(1\text{A}) = 101.0(1)$ ,  $\text{Li}(1)\cdots\text{B}(1)\cdots\text{Li}(2) = 78.3(1)$ ,  $\text{Li}(1)\cdots\text{B}(1\text{A})\cdots\text{Li}(2) = 78.9(1)$ ;  $\text{C}(1)\text{C}(2)\text{C}(3)//\text{C}(1\text{A})\text{C}(2\text{A})\text{C}(3\text{A}) = 7.0$ .

**Table 1S:** Crystallographic Data for **3** and **4**.

|                                                      | <b>3</b>                                                      | <b>4</b>                                        |
|------------------------------------------------------|---------------------------------------------------------------|-------------------------------------------------|
| formula                                              | C <sub>18</sub> H <sub>28</sub> B <sub>2</sub> O <sub>4</sub> | C <sub>18</sub> H <sub>28</sub> Br <sub>2</sub> |
| <i>fw</i>                                            | 330.02                                                        | 404.22                                          |
| colour, shape                                        | colourless, block                                             | colourless, plate                               |
| temp (K)                                             | 173(2)                                                        | 173(2)                                          |
| cryst. syst.                                         | triclinic                                                     | triclinic                                       |
| space group                                          | <i>P</i> $\bar{1}$                                            | <i>P</i> $\bar{1}$                              |
| <i>a</i> (Å)                                         | 8.3824(8)                                                     | 6.6943(6)                                       |
| <i>b</i> (Å)                                         | 9.8427(9)                                                     | 7.8948(8)                                       |
| <i>c</i> (Å)                                         | 12.8041(12)                                                   | 9.8024(9)                                       |
| $\alpha$ (deg)                                       | 102.329(7)                                                    | 109.190(7)                                      |
| $\beta$ (deg)                                        | 96.038(8)                                                     | 99.292(7)                                       |
| $\gamma$ (deg)                                       | 110.013(7)                                                    | 108.450(7)                                      |
| <i>V</i> (Å <sup>3</sup> )                           | 951.26(15)                                                    | 443.27(7)                                       |
| <i>Z</i>                                             | 2                                                             | 1                                               |
| <i>D</i> <sub>calcd.</sub> (g cm <sup>-3</sup> )     | 1.152                                                         | 1.514                                           |
| <i>F</i> (000)                                       | 356                                                           | 206                                             |
| $\mu$ (mm <sup>-1</sup> )                            | 0.077                                                         | 4.563                                           |
| cryst. size (mm)                                     | 0.25 × 0.24 × 0.22                                            | 0.25 × 0.25 × 0.13                              |
| reflections collected                                | 14687                                                         | 7617                                            |
| indep. reflns ( <i>R</i> <sub>int</sub> )            | 3545 (0.0378)                                                 | 1798 (0.0594)                                   |
| data/restraints/params                               | 3545 /0/218                                                   | 1798/0/92                                       |
| GOOF on <i>F</i> <sup>2</sup>                        | 1.024                                                         | 1.077                                           |
| <i>R</i> 1, <i>wR</i> 2 ( <i>I</i> > 2σ( <i>I</i> )) | 0.0385, 0.0928                                                | 0.0243, 0.0592                                  |
| <i>R</i> 1, <i>wR</i> 2 (all data)                   | 0.0494, 0.0973                                                | 0.0257, 0.0597                                  |
| Largest diff peak and hole (eÅ <sup>-3</sup> )       | 0.234 and -0.156                                              | 0.383 and -0.545                                |

**Table 2S:** Crystallographic Data for **5** and (Li(thf)<sub>2</sub>)<sub>2</sub>[**6**].

|                                                      | <b>5</b>                                                      | (Li(thf) <sub>2</sub> ) <sub>2</sub> [ <b>6</b> ]                             |
|------------------------------------------------------|---------------------------------------------------------------|-------------------------------------------------------------------------------|
| formula                                              | C <sub>30</sub> H <sub>52</sub> B <sub>2</sub> O <sub>4</sub> | C <sub>34</sub> H <sub>66</sub> B <sub>2</sub> Li <sub>2</sub> O <sub>4</sub> |
| <i>fw</i>                                            | 498.34                                                        | 574.37                                                                        |
| colour, shape                                        | colourless, block                                             | colourless, needle                                                            |
| temp (K)                                             | 293(2)                                                        | 173(2)                                                                        |
| cryst. syst.                                         | triclinic                                                     | triclinic                                                                     |
| space group                                          | <i>P</i> $\bar{1}$                                            | <i>P</i> $\bar{1}$                                                            |
| <i>a</i> (Å)                                         | 7.6693(9)                                                     | 9.2666(10)                                                                    |
| <i>b</i> (Å)                                         | 9.4074(10)                                                    | 14.2673(15)                                                                   |
| <i>c</i> (Å)                                         | 11.9721(13)                                                   | 15.9830(19)                                                                   |
| <i>α</i> (deg)                                       | 76.715(8)                                                     | 67.763(8)                                                                     |
| <i>β</i> (deg)                                       | 86.255(9)                                                     | 76.707(9)                                                                     |
| <i>γ</i> (deg)                                       | 73.941(8)                                                     | 75.464(9)                                                                     |
| <i>V</i> (Å <sup>3</sup> )                           | 807.84(16)                                                    | 1871.7(4)                                                                     |
| <i>Z</i>                                             | 1                                                             | 2                                                                             |
| <i>D</i> <sub>calcd.</sub> (g cm <sup>-3</sup> )     | 1.024                                                         | 1.019                                                                         |
| <i>F</i> (000)                                       | 274                                                           | 636                                                                           |
| <i>μ</i> (mm <sup>-1</sup> )                         | 0.064                                                         | 0.062                                                                         |
| cryst. size (mm)                                     | 0.51 × 0.48 × 0.39                                            | 0.32 × 0.14 × 0.13                                                            |
| reflections collected                                | 13355                                                         | 11646                                                                         |
| indep. reflns ( <i>R</i> <sub>int</sub> )            | 2851 (0.0754)                                                 | 6579 (0.0788)                                                                 |
| data/restraints/params                               | 2851/0/163                                                    | 6579/0/381                                                                    |
| GOOF on <i>F</i> <sup>2</sup>                        | 1.112                                                         | 0.829                                                                         |
| <i>R</i> 1, <i>wR</i> 2 ( <i>I</i> > 2σ( <i>I</i> )) | 0.0841, 0.2535                                                | 0.0572, 0.0961                                                                |
| <i>R</i> 1, <i>wR</i> 2 (all data)                   | 0.1003, 0.2677                                                | 0.1275, 0.1117                                                                |
| Largest diff peak and hole (eÅ <sup>-3</sup> )       | 0.368 and -0.284                                              | 0.233 and -0.196                                                              |
